# Supplementary material for: Tracking Antimicrobial Resistance Determinants in Diarrheal Pathogens: A Cross-Institutional Pilot Study
Source: Int J Mol Sci. 2020 Aug 18;21(16):5928. doi: 10.3390/ijms21165928 (PMC7460656; doi:10.3390/ijms21165928)
Supplement: Supplementary file 1 [file ijms-21-05928-s001.xlsx]

## Sheet: USA 
Strain Code ->	State	Year	ID			Age group	TET	AMK	GEN	KAN	STR	AMP	FOX	TIO	AXO	AMC	AZM	ERY	TEL	CHL	FFN	CIP	NAL	FIS
2009-0092	CA	2009	CAMPYLOBACTER	JEJUNI		30-39	R	n/a	S	n/a	n/a	n/a	n/a	n/a	n/a	n/a	S	S	S	n/a	S	S	S	n/a
2009-0609	TN	2009	CAMPYLOBACTER	JEJUNI		50-59	R	n/a	S	n/a	n/a	n/a	n/a	n/a	n/a	n/a	S	S	S	n/a	S	S	S	n/a
2009-0770	MN	2009	CAMPYLOBACTER	COLI		70-79	R	n/a	S	n/a	n/a	n/a	n/a	n/a	n/a	n/a	S	S	S	n/a	S	S	S	n/a
2009-0896	MD	2009	CAMPYLOBACTER	upsaliensis		80+	R	n/a	S	n/a	n/a	n/a	n/a	n/a	n/a	n/a	S	S	S	n/a	S	S	S	n/a
2009-148-4	OR	2009	CAMPYLOBACTER	COLI		0-4	R	n/a	S	n/a	n/a	n/a	n/a	n/a	n/a	n/a	S	S	S	n/a	S	S	S	n/a
AM26393	CA	2006	SHIGELLA	SONNEI		10-19	R	S	S	S	R	S	S	S	S	S	n/a	n/a	n/a	S	n/a	S	S	R
AM26600	Illinois	2006	Escherichia	coli	O157:H7	10-19	R	S	S	S	S	S	S	S	S	S	n/a	n/a	n/a	S	n/a	S	S	S
AM27490	AZ	2006	SHIGELLA	FLEXNERI		0-4	R	S	S	S	S	R	S	S	S	I	n/a	n/a	n/a	R	n/a	S	S	S
AM29810	Alabama	2007	Escherichia	coli	O157:H7	0-4	R	S	S	S	S	S	S	S	S	S	n/a	n/a	n/a	S	n/a	S	S	S
AM30576	WI	2006	ESCHERICHIA	COLI	H7	0-4	R	S	S	S	S	S	S	S	S	S	n/a	n/a	n/a	S	n/a	S	S	S
AM30643	New York City	2007	Shigella	flexneri		0-4	R	S	S	S	R	R	S	S	S	I	n/a	n/a	n/a	R	n/a	S	S	S
AM31440	LX	2007	SALMONELLA	ENTERICA	TYPHI	60-69	R	S	S	S	R	R	S	S	S	S	n/a	n/a	n/a	R	n/a	I	R	R
AM31857	OH	2007	SALMONELLA	ENTERICA	NEWPORT	n/a	R	S	S	S	R	R	R	R	R	R	n/a	n/a	n/a	R	n/a	S	S	R
AM34944	Nebraska	2008	Escherichia	coli	O157:H7	70-79	R	S	S	S	S	S	S	S	S	S	n/a	n/a	n/a	S	n/a	S	S	S
AM35420	AL	2007	ESCHERICHIA	COLI	H7	n/a	R	S	S	S	R	R	S	S	S	S	n/a	n/a	n/a	S	n/a	R	R	R
AM35543	AL	2008	SALMONELLA	ENTERICA	ANATUM	70-79	R	S	S	S	S	S	S	S	S	S	n/a	n/a	n/a	S	n/a	S	S	S
AM37131	RI	2008	SALMONELLA	ENTERICA	AGONA	60-69	R	S	S	S	R	R	R	R	R	R	n/a	n/a	n/a	S	n/a	S	S	R
AM37371	Texas	2008	Shigella	sonnei		10-19	R	S	S	S	R	S	S	S	S	S	n/a	n/a	n/a	S	n/a	S	S	R
AM37688	TX	2008	SALMONELLA	ENTERICA	HEIDELBERG	40-49	R	S	S	S	S	S	S	S	S	S	n/a	n/a	n/a	S	n/a	S	S	S
AM39705	MA	2009	SHIGELLA	BOYDII		0-4	R	S	S	S	R	R	S	S	S	S	n/a	n/a	n/a	S	n/a	S	S	R
AM39774	SD	2009	SALMONELLA	ENTERICA	TYPHIMURIUM	0-4	R	S	S	S	R	R	S	S	S	I	n/a	n/a	n/a	R	n/a	S	S	R
AM40072	GA	2009	SHIGELLA	DYSENTERIAE		30-39	R	S	S	S	R	S	S	S	S	S	n/a	n/a	n/a	S	n/a	S	S	R
AM40625	Indiana	2009	Escherichia	coli	O157:H7	10-19	R	S	S	S	S	S	S	S	S	S	n/a	n/a	n/a	S	n/a	S	S	R
AM42175	CO	2009	SALMONELLA	ENTERICA	DUBLIN	5-9	R	S	S	R	R	R	S	S	S	S	n/a	n/a	n/a	R	n/a	S	S	R
AM42241	IN	2010	SHIGELLA	SONNEI		60-69	R	S	S	S	R	S	S	S	S	S	n/a	n/a	n/a	S	n/a	S	R	R
AM43606	PA	2010	SALMONELLA	ENTERICA	ENTERITIDIS	0-4	R	S	S	S	R	R	S	S	S	S	n/a	n/a	n/a	S	n/a	S	S	R
AM44996	Texas	2010	Escherichia	coli	O157:H7	10-19	R	S	S	S	S	S	S	S	S	S	n/a	n/a	n/a	S	n/a	S	S	R
					ave	30.9
					median	15
AMC	amoxicillin-clavulanate
AMK	Amikacin
AMP	ampicillin
ATM	aztreonam
AUG	amoxicillin-clavulanate
AXO	ceftriaxone
AZM	azithromycin
CAZ	ceftaxidime
CF	cefalothin
CFZ	cefazolin
CHL, CHL30	chloramphenicol
CIP	ciprofloxacin
CRO	ceftriaxone
CTX	cefotaxime
ERY	erythromycin
ETP	ertapenem
FFN	florfenicol
FIS	sulfisoxazole
FOX	cefoxitin
GEM	gemifloxacin
GEN	Gentamicin
IPM	imipenem
KAN	Kanamycin
LVX	Levofloxacin
MEM	meropenem
MXF	moxifloxacin
NAL	nalidixic acid
STR	streptomycin
SXT	trimethoprim/sulfamethoxazole
TEL	telithromycin
TET	tetracycline
tim	ticarcillin-clavulanic acid
TIO	ceftiofur
TOB	Tobramycin
TZP	piperacillin-tazobactam
n/a	Data not available
ESBL	Extended spectrum beta-lactamase

## Sheet: Peru
Sample code	Isolate	City	Year	Sex	Age	TET	AMC	AMP	CRO	CEF	ERY	CHL30	CIP	NAL	GEN	SXT
GLO16502	CAMPYLOBACTER COLI	CALLAO	2007	M	20	R	S	I	R	R	R	S	R	R	S	R
GLO22122	CAMPYLOBACTER COLI	LIMA	2010	F	35	R	S	R	R	R	S	S	R	R	S	R
GLO23818	CAMPYLOBACTER COLI	CUZCO	2010	F	2	R	S	R	I	R	I	S	R	R	S	R
GLO15140	CAMPYLOBACTER JEJUNI JEJUNI	CALLAO	2006	M	60	R	S	S	I	R	S	S	S	S	S	R
GLO21758	CAMPYLOBACTER JEJUNI JEJUNI	CALLAO	2009	M	5	R	S	S	I	R	S	S	R	R	S	R
GLO22133	CAMPYLOBACTER JEJUNI JEJUNI	CUZCO	2010	F	25	R	S	R	S	R	S	R	R	R	S	R
GLO23357	CAMPYLOBACTER JEJUNI JEJUNI	LIMA	2010	M	11	R	S	R	S	R	S	S	R	R	S	R
GLO28680	SHIGELLA SP	n/a	n/a	n/a	n/a	R	n/a	n/a	n/a	n/a	n/a	n/a	n/a	n/a	n/a	n/a
GLO19032	ESCHERICHIA COLI LT+/ST+	LAMBAYEQUE	2008	F	40	R	I	R	S	I	R	S	S	S	S	R
GLO21029	ESCHERICHIA COLI ST+	IQUITOS	2009	M	18	R	I	R	S	R	R	S	S	S	S	R
GLO25723	ESCHERICHIA COLI-ENTEROPATHOGENIC (EPEC)	CUZCO	2011	F	1.5	R	S	R	S	I	R	S	S	I	S	R
GLO20541	SALMONELLA GR.B	LIMA	2009	M	16	R	S	S	S	S	I	S	S	S	S	n/a
GLO21751	SALMONELLA GR.B	CALLAO	2009	F	32	R	S	R	S	I	R	R	S	S	S	R
GLO24911	SALMONELLA GR.B	LIMA	2011	F	48	R	S	S	S	S	R	S	S	R	S	S
GLO21192	SALMONELLA GR.C1	LIMA	2009	M	2	R	S	S	S	S	R	S	S	R	S	R
GLO21756	SALMONELLA GR.C1	CALLAO	2009	F	30	R	I	S	S	S	R	S	S	R	S	R
GLO21493	SALMONELLA GR.D (NON-TYPHI)	CALLAO	2009	M	28	R	S	S	S	S	R	S	S	R	S	R
GLO23444	SALMONELLA GR.D (NON-TYPHI)	LIMA	2010	M	9	R	R	S	S	S	R	S	S	S	R	R
GLO23598	SALMONELLA GR.D (NON-TYPHI)	CUZCO	2010	F	3	R	S	S	S	S	R	S	S	R	S	R
GLO17294	SHIGELLA BOYDII (GR.C)	CUZCO	2007	M	26	R	R	R	S	S	R	R	S	S	S	R
GLO17809	SHIGELLA BOYDII (GR.C)	LIMA	2008	F	10	R	S	S	S	I	R	S	S	S	S	R
GLO18471	SHIGELLA DYSENTERIAE (GR.A)	PIURA	2008	F	68	R	R	R	S	R	R	R	R	R	S	R
GLO16277	SHIGELLA SONNEI (GR.D)	LIMA	2007	M	15	R	I	R	S	I	R	R	S	S	S	R
GLO16670	SHIGELLA SONNEI (GR.D)	LIMA	2007	F	11	R	I	R	S	I	R	R	S	S	S	R
				mean age	22.41
				median age	18

## Sheet: Kenya
SPECIMEN ID	LAN	PATHOTYPE	DATE	age (years)	gender	TET	AMK	TOB	AMC	SAM	TIM	TZP	ETP	IPM	MEM	AMP	ATM	CFZ	CTX	CFX	CAZ	CIP	GEM	LVX	MXF	SXT
EPS1549-IDH-0051A	MHK 03735	Campy jejuni	2013	1	F	R	n/a	n/a	n/a	n/a	n/a	n/a	n/a	n/a	n/a	n/a	n/a	n/a	n/a	n/a	n/a	n/a	n/a	n/a	n/a	n/a
EPS1549-KCH-0164A	MHK 01244	E.coli	2012	3	F	R	S	S	S	R	S	S	n/a	S	S	R	S	S	S	S	S	S	S	S	S	R
EPS1549-KDH-0154A	MHK 00910	E coli(EAEC)	2012	1.25	M	R	R	I	R	R	I	S	n/a	R	R	R	R	R	R	R	R	R	I	R	R	R
EPS1549-MBG-0294A	MHK 02371	Escherichia coli	2011	1.25	M	R	S	S	R	R	I	S	S	S	S	R	S	I	S	S	S	S	S	S	S	R
EPS1549-KDH-0069A	MHK 00452	E coli (EHEC)	2012	17	F	R	S	S	R	I	S	S	n/a	S	S	R	S	S	S	S	S	S	S	S	S	R
EPS1549-KSI-0048A	MHK 01955	Escherichia coli	2012	2.45	F	R	S	S	I	R	I	S	S	S	S	R	S	S	S	S	S	S	S	S	S	R
EPS1549-MBG-0117B	MHK 01124	E coli (ETEC)	2011	10 mo	M	R	S	S	S	R	S	S	n/a	S	S	R	S	S	S	S	S	S	S	S	S	R
EPS1549-KCH-0193B	MHK 01850	E coli (ETEC)	2012	3	F	R	S	R	I	R	I	S	n/a	S	S	R*	ESBL	R*	ESBL	S	ESBL	S	R	S	S	R
EPS1549-NNP-0007A	MHK 00122	E coli (ETEC)- ESBL	2012	7mo	M	R	R	I	R	R	I	S	n/a	R	R	R	R	R	R	R	R	R	I	R	R	R
EPS1549-NNP-0028A	MHK 00246	Salmonella group o	2011	6.45	M	R	S	<=4	I	R	R	S	S	S	S	R	S	S	S	S	S	S	<=4	S	S	R
101004143	NTS00869	Salmonella grp O poly A	2012	10 mo	F	R	n/a	n/a	n/a	n/a	n/a	n/a	n/a	n/a	n/a	n/a	n/a	n/a	n/a	n/a	n/a	n/a	n/a	n/a	n/a	n/a
EPS1549-KOM-0009A	MHK 03649	Salmonella spp	2012	28	F	R	S	>8	R	R	R	I	S	S	S	R*	ESBL	R*	ESBL	S	ESBL	S	>8	S	S	R
EPS1549-NNY-0063A	MHK 01375	Salmonella typhi	2011	6	F	R	S	<=4	S	R	S	S	S	S	S	S	S	S	S	S	S	S	<=4	S	S	R
20104265	NTS00775B	Salmonella typhi	2012	4	F	R	S	<=4	S	R	I	S	S	S	S	R	S	n/a	S	S	S	S	<=4	S	S	R
20203616	NTS00795B	Salmonella typhi	2012	2.66	F	S	S	<=4	S	S	S	S	S	S	S	S	S	n/a	S	S	S	S	<=4	S	S	S
EPS1549-NNY-0062A	MHK 00475	S. dysenteriae	2011	4	M	R	S	<=4	S	I	S	S	S	S	S	R	S	<=8	S	S	S	S	<=4	S	S	R
EPS1549-KSI-0141A	MHK 02686	S. dysenteriae	2013	50	F	R	S	<=4	S	I	S	S	S	S	S	R	S	<=8	S	S	S	S	<=4	S	S	R
EPS1549-KSI-0026A	MHK 01659	Shigella flexneri	2012	24	F	R	S	<=4	S	S	S	S	S	S	S	S	S	<=8	S	S	S	S	<=4	S	S	R
EPS1549-KSI-0118A	MHK 02530	Shigella flexneri	2012	13 mo	M	R	S	<=4	S	S	S	S	S	S	S	R	S	<=8	S	S	S	S	<=4	S	S	R
102002249	NTS00420	Shigella sonnei	2012	6 mo	F	R	S	<=4	S	S	S	S		S	S	S	S	<=8	S	S	S	S	<=4	S	S	R
EPS1549-KDH-0008A	MHK 00049	Shigella sonnei	2009	8 mo	F	R	S	<=4	S	S	S	S	S	S	S	S	S	<=8	S	S	S	S	<=4	S	S	R
EPS1549-MBG-0063A	MHK 00839	Shigella sonnei	2011	28	F	R	S	<=4	S	S	S	S	S	S	S	S	S	<=8	S	S	S	S	<=4	S	S	R
EPS1549-KSI-0160A	MHK 02817	Shigella sonnei	2012	3	F	R	S	<=4	S	S	S	S	S	S	S	S	S	<=8	S	S	S	S	<=4	S	S	R
101004091	NTS00863	Shigella sonnei	2012	4.6	F	R	S	<=4	S	S	S	S	S	S	S	S	S	<=8	S	S	S	S	<=4	S	S	R
			mean age	8.09
			median age	3

## Sheet: Egypt
CRL_NO	BACT_NAME	date	sex	TET	AMP	CHL	ERY	CIP	NAL	STR	SXT
11-002187	Campylobacter jejuni	2011	n/a	R	R	S	S	R	R	R	R
12-000075	Campylobacter jejuni	2012	n/a	R	R	S	S	R	R	R	R
12-001516	Campylobacter jejuni	2012	n/a	R	R	S	R	R	R	R	R
11-004690	Campylobacter jejuni	2011	n/a	R	R	S	S	R	R	R	R
13-001902	Ecoli	2013	n/a	R	n/a	n/a	n/a	n/a	n/a	n/a	n/a
13-002453	Ecoli	2013	n/a	R	n/a	n/a	n/a	n/a	n/a	n/a	n/a
13-002915	Ecoli	2013	n/a	R	n/a	n/a	n/a	n/a	n/a	n/a	n/a
13-002918	Ecoli	2013	n/a	R	n/a	n/a	n/a	n/a	n/a	n/a	n/a
13-002940	Ecoli	2013	n/a	R	n/a	n/a	n/a	n/a	n/a	n/a	n/a
13-002969	Ecoli	2013	n/a	R	n/a	n/a	n/a	n/a	n/a	n/a	n/a
13-002997	Ecoli	2013	n/a	R	n/a	n/a	n/a	n/a	n/a	n/a	n/a
13-002999	Ecoli	2013	n/a	R	n/a	n/a	n/a	n/a	n/a	n/a	n/a
08-005325	Sal	2008	n/a	R	n/a	n/a	n/a	n/a	n/a	n/a	n/a
08-005565	Sal	2008	n/a	R	n/a	n/a	n/a	n/a	n/a	n/a	n/a
09-000562	Sal	2009	n/a	R	n/a	n/a	n/a	n/a	n/a	n/a	n/a
09-003667	Sal	2009	n/a	R	n/a	n/a	n/a	n/a	n/a	n/a	n/a
11-004206	Salmonella grp C1	2011	n/a	R	R	R	R	I	R	R	R
11-002134	Shigella bodyii	2011	n/a	R	R	R	R	S	S	R	R
12-000076	Shigella bodyii (C2)	2012	n/a	R	R	R	R	S	I	R	R
11-003924	Shigella flexneri	2011	n/a	R	R	R	R	S	S	I	R
11-004001	Shigella flexneri	2011	n/a	R	R	R	R	S	I	R	S
11-004419	Shigella flexneri	2011	n/a	R	R	R	R	S	S	R	S
11-005350	Shigella flexneri	2011	n/a	R	R	S	R	S	S	R	R
11-005993	Shigella flexneri	2011	n/a	R	R	R	R	S	S	R	R
12-002280	Shigella flexneri	2012	n/a	R	R	I	R	S	S	R	S
11-002139	Shigella sonnei	2011	n/a	R	S	S	R	S	S	R	R
11-003351	Shigella sonnei	2011	n/a	R	S	S	R	S	S	R	R
11-004011	Shigella sonnei	2011	n/a	R	R	S	R	S	S	R	R
12-001223	Shigella sonnei	2012	n/a	R	S	S	R	S	S	R	R

## Sheet: Cambodia
		date	age (years)	sex	TET	AMP	CRO	CHL	CIP	LVX	NAL	SXT
DYS0218	Campy jejun	2010	1	M	R	n/a	n/a	n/a	R*	n/a	n/a	n/a
DYS0210	Campy jejuni	2010	11 mo	F	R	n/a	n/a	n/a	R*	n/a	n/a	n/a
DYS0227	Campylobacter sp.	2011	1	M	R	n/a	n/a	n/a	S*	n/a	n/a	n/a
DYS0284	Campylobacter coli	2012	1	M	R	n/a	n/a	n/a	R*	n/a	n/a	n/a
AD00332	E. coli ETEC	2013	2	M	R	n/a	n/a	n/a	n/a	n/a	n/a	n/a
DYS0146	E. coli ETEC	2010	9 mo.	M	R				R*	n/a	n/a	n/a
AD1201	EAEC	2013	1	F	R	n/a	n/a	n/a	n/a	n/a	n/a	n/a
AD00905	EPEC	2013	8	F	R	n/a	n/a	n/a	n/a	n/a	n/a	n/a
AD00633	S. flexneri	2013	1	F	R	R	S	S	S	S	R	R
AD00570	S. typhimurium	2013	7 mo	M	R	R	R	R	S	S	I	S
DYS0105	S. typhimurium	2010	47	M	R	S	S	S	S	S	S	S
DYS0230	S. typhimurium	2011	13	M	R	R	S	S	S	S	S	S
FSS9078	S. typhimurium	2009	13	M	R	R	S	S	S	S	S	S
DYS170	Shigella sp.	2010	5 mo	M	R	n/a	n/a	n/a	R*	n/a	n/a	n/a
FSS 4676	Shigella boydii	2009	10	M	R	S	S	S	S	S	S	S
FSS10579	Shigella flexneri	2010	3	F	R	R	S	R	S	S	R	R
FSS11781	Shigella flexneri	2010	2	F	R	R	S	R	S	S	R	R
FSS12022	Shigella flexneri	2010	4	M	R	R	S	R	S	S	R	R
FSS12974	Shigella flexneri	2010	22	F	R	R	S	R	R	S	R	R
FSS5683	Shigella flexneri	2009	2	M	R	R	S	R	S	S	R	R
DYS0181	Shigella flexneri serotype 3a	2010	2	M	R	R	S	R	S	S	R	R
DYS145	Shigella flexneri serotype 6	2010	5 mo	M	R	R	S	R	S	S	S	R
FSS 9999	Shigella sonnei	2009	47	F	R	S	S	S	S	S	R	R
		ave	7.96
		median	2
